# Supplementary material
Source: PubMed Central journal article supplement (PMC10387938)
Supplement: jmcp.2023.29.4.365_s001.pdf [file jmcp.2023.29.4.365_s001.pdf]

## **SUPPLEMENTARY MATERIALS**

### **Prolonged oral corticosteroid treatment in patients with systemic lupus erythematosus: An evaluation of 12-month economic and clinical burden**

Shirley P Huang, PharmD, MS; Maral DerSarkissian, PhD; Yuqian M Gu, MS; Mei Sheng Duh, MPH, ScD; Min-Jung Wang, ScD, MS; John Benson, BA; Jensen Vu, BA; Carlyne Averell, MS, SM; Christopher F Bell, PharmD

**SUPPLEMENTARY MATERIAL** Included OCS therapies

**SUPPLEMENTARY TABLE 1** ICD-9-CM and ICD-10-CM codes used for baseline comorbidities

**SUPPLEMENTARY TABLE 2** 12-Month disease severity and flare occurrence (N=37,726)

**SUPPLEMENTARY TABLE 3** Health care costs for the prevalent OCS use cohort (>7.5 mg/day) exposure categories and the no OCS use cohort, over the 12-month observation period (N=37,725)

**SUPPLEMENTARY TABLE 4** Odds of experiencing OCS-related AEs by organ domain in the prevalent OCS use cohort exposure categories and the no OCS use cohort over the observation period (N=37,725)

**SUPPLEMENTARY FIGURE 1** Study attrition

**SUPPLEMENTARY FIGURE 2** OCS ADD by observation period and days supply definitions (N=16,209)

## **Supplementary Material**

### **Included OCS therapies**

OCS therapies included oral formulations of:

Betamethasone

Budesonide

Cortisone

Deflazacort

Dexamethasone

Fludrocortisone

Hydrocortisone

Methylprednisolone

Prednisolone

Prednisone

Triamcinolone

**Supplementary Table 1. ICD-9-CM and ICD-10-CM codes used for baseline comorbidities**

| Category   | Condition         | ICD-9-CM Code(s) | Description                                  | ICD-10-CM Code(s)                        | Description                                                                                                                                                       |
|------------|-------------------|------------------|----------------------------------------------|------------------------------------------|-------------------------------------------------------------------------------------------------------------------------------------------------------------------|
| Infections | Fungal infections | 110.xx           | Dermatophytosis                              | B35.x                                    | Dermatophytosis                                                                                                                                                   |
|            |                   | 111.xx           | Dermatomyces other and unspecified           | B36.x                                    | Other superficial mycoses                                                                                                                                         |
|            |                   | 112.xx           | Candidiasis                                  | B37.x                                    | Candidiasis                                                                                                                                                       |
|            |                   | 117.xx           | Other mycoses                                | B48.x<br>B49                             | Other mycoses, not elsewhere classified<br>Unspecified mycosis                                                                                                    |
|            |                   | 118              | Opportunistic mycoses                        | B48.8                                    | Other specified mycoses                                                                                                                                           |
|            |                   | 202.1x           | Mycosis fungoides                            | C84.0x                                   | Mycosis fungoides                                                                                                                                                 |
|            |                   | 370.05           | Mycotic corneal ulcer                        | H16.061<br>H16.062<br>H16.063<br>H16.069 | Mycotic corneal ulcer, right eye<br>H16.062 Mycotic corneal ulcer, left eye<br>H16.063 Mycotic corneal ulcer, bilateral<br>Mycotic corneal ulcer, unspecified eye |
|            |                   | 484.7            | Pneumonia in other systemic mycoses          | J17                                      | Pneumonia in diseases classified elsewhere                                                                                                                        |
|            |                   | V75.4            | Screening examination for mycotic infections | Z11.8                                    | Encounter for screening for other infectious and parasitic diseases                                                                                               |
|            |                   | Pneumonia        | 003.22                                       | Salmonella pneumonia                     | A02.22                                                                                                                                                            |
|            | 011.6x            |                  | Tuberculous pneumonia                        | A15.0                                    | Tuberculosis of lung                                                                                                                                              |
|            | 020.5x            |                  | Pneumonic plague, unspecified                | A20.2                                    | Pneumonic plague                                                                                                                                                  |
|            | 055.1x            |                  | Postmeasles pneumonia                        | B05.2                                    | Measles complicated by pneumonia                                                                                                                                  |
|            | 073.0x            |                  | Ornithosis with pneumonia                    | A70 and<br>J17                           | Chlamydia psittaci infections AND Pneumonia in diseases classified elsewhere                                                                                      |

|  |  |        |                                                                     |                                               |                                                                                                                                                                                                                                                                                                       |
|--|--|--------|---------------------------------------------------------------------|-----------------------------------------------|-------------------------------------------------------------------------------------------------------------------------------------------------------------------------------------------------------------------------------------------------------------------------------------------------------|
|  |  | 112.4x | Candidiasis of lung                                                 | B37.1                                         | Pulmonary candidiasis                                                                                                                                                                                                                                                                                 |
|  |  | 115.15 | Infection by <i>Histoplasma duboisii</i> , pneumonia                | B39.5 and<br>J17                              | <i>Histoplasmosis duboisii</i> AND Pneumonia in diseases classified elsewhere                                                                                                                                                                                                                         |
|  |  | 115.95 | Histoplasmosis, unspecified, pneumonia                              | B39.9 and<br>J17                              | Histoplasmosis, unspecified AND Pneumonia in diseases classified elsewhere                                                                                                                                                                                                                            |
|  |  | 136.3x | Pneumocystosis                                                      | B59                                           | Pneumocystosis                                                                                                                                                                                                                                                                                        |
|  |  | 466.1x | Acute bronchiolitis                                                 | J21.x                                         | Acute bronchiolitis                                                                                                                                                                                                                                                                                   |
|  |  | 480.xx | Viral pneumonia                                                     | J12.x                                         | Viral pneumonia, not elsewhere classified                                                                                                                                                                                                                                                             |
|  |  | 481.xx | Pneumococcal pneumonia [ <i>Streptococcus pneumoniae</i> pneumonia] | J13<br>J18.1                                  | Pneumonia due to <i>Streptococcus pneumoniae</i><br>Lobar pneumonia, unspecified organism                                                                                                                                                                                                             |
|  |  | 482.xx | Other bacterial pneumonia                                           | J15.x                                         | Bacterial pneumonia, not elsewhere classified                                                                                                                                                                                                                                                         |
|  |  | 483.xx | Pneumonia due to other specified organism                           | J15.7<br>J16.0<br>J16.8                       | Pneumonia due to <i>Mycoplasma pneumoniae</i><br>Chlamydial pneumonia<br>Pneumonia due to other specified infectious organisms                                                                                                                                                                        |
|  |  | 484.xx | Pneumonia in infectious diseases classified elsewhere               | B25.0<br>A37.01<br>A37.11<br>A37.81<br>A37.91 | Cytomegaloviral pneumonitis<br>Whooping cough due to <i>Bordetella pertussis</i> with pneumonia<br>Whooping cough due to <i>Bordetella parapertussis</i> with pneumonia<br>Whooping cough due to other <i>Bordetella</i> species with pneumonia<br>Whooping cough, unspecified species with pneumonia |

|  |  |        |                                                                      |                                                                                                                                                                                               |
|--|--|--------|----------------------------------------------------------------------|-----------------------------------------------------------------------------------------------------------------------------------------------------------------------------------------------|
|  |  |        | A22.1<br>B44.0<br>J17                                                | Pulmonary anthrax<br>Invasive pulmonary aspergillosis<br>Pneumonia in diseases classified elsewhere                                                                                           |
|  |  | 485.xx | Bronchopneumonia, organism unspecified                               | J18.0<br>Bronchopneumonia, unspecified organism                                                                                                                                               |
|  |  | 486.xx | Pneumonia, organism unspecified                                      | J18.8<br>Other pneumonia, unspecified organism<br>J18.9<br>Pneumonia, unspecified organism                                                                                                    |
|  |  | 487.0x | Influenza with pneumonia                                             | J10.0x<br>Influenza due to other identified influenza virus with pneumonia<br>J11.0x<br>Influenza due to unidentified influenza virus with pneumonia<br>J12.9<br>Viral pneumonia, unspecified |
|  |  | 488.01 | Influenza due to identified avian influenza virus with pneumonia     | J09.X1<br>Influenza due to identified novel influenza A virus with pneumonia                                                                                                                  |
|  |  | 488.11 | Influenza due to identified 2009 h1n1 influenza virus with pneumonia | J10.08<br>Influenza due to other identified influenza virus with other specified pneumonia                                                                                                    |
|  |  | 514    | Pulmonary congestion and hypostasis                                  | J18.2<br>Hypostatic pneumonia, unspecified organism<br>J81.1<br>Chronic pulmonary edema                                                                                                       |
|  |  | 516.8  | Other specified alveolar and parietoalveolar pneumonopathies         | J84.09<br>Other alveolar and parieto-alveolar conditions                                                                                                                                      |
|  |  | 517.1x | Rheumatic pneumonia                                                  | J17<br>Pneumonia in diseases classified elsewhere                                                                                                                                             |

|  |              |               |                                                                        |                   |                                                                                                                                                                                                         |
|--|--------------|---------------|------------------------------------------------------------------------|-------------------|---------------------------------------------------------------------------------------------------------------------------------------------------------------------------------------------------------|
|  |              | 518.3x        | Pulmonary eosinophilia                                                 | J82               | Pulmonary eosinophilia, not elsewhere classified                                                                                                                                                        |
|  |              | V12.61        | Personal history of pneumonia (recurrent)                              | Z87.01            | Personal history of pneumonia (recurrent)                                                                                                                                                               |
|  |              | V73.9x        | Screening examination for unspecified viral and chlamydial disease     | Z11.8<br>Z11.59   | Encounter for screening for other infectious and parasitic diseases<br>Encounter for screening for other viral diseases                                                                                 |
|  | Tuberculosis | 010.xx-018.xx | Tuberculosis                                                           | A15.xx-<br>A19.xx | Tuberculosis                                                                                                                                                                                            |
|  |              | 795.5x        | Nonspecific reaction to test for tuberculosis                          | R76.11<br>R76.12  | Nonspecific reaction to tuberculin skin test without active tuberculosis<br>Nonspecific reaction to cell mediated immunity measurement of gamma interferon antigen response without active tuberculosis |
|  |              | V01.1         | Contact with or exposure to tuberculosis                               | Z20.1             | Contact with and (suspected) exposure to tuberculosis                                                                                                                                                   |
|  |              | V03.2         | Need for prophylactic vaccination and inoculation against tuberculosis | Z23               | Encounter for immunization                                                                                                                                                                              |
|  |              | V71.2         | Observation for suspected tuberculosis                                 | Z03.89            | Encounter for observation for other suspected diseases and conditions ruled out                                                                                                                         |
|  |              | V74.1         | Screening examination for pulmonary tuberculosis                       | Z11.1             | Encounter for screening for respiratory tuberculosis                                                                                                                                                    |
|  |              | 599.0x        | Chronic pyelonephritis                                                 | N39.0             | Urinary tract infection, site not specified                                                                                                                                                             |

|        |                         |        |                                                                     |                                                 |                                                                                                                                                                                                                                                                                                              |
|--------|-------------------------|--------|---------------------------------------------------------------------|-------------------------------------------------|--------------------------------------------------------------------------------------------------------------------------------------------------------------------------------------------------------------------------------------------------------------------------------------------------------------|
|        | Urinary tract infection | 997.5x | Urinary complications, not elsewhere classified                     | N99.0<br>N99.52x<br>N99.53x<br>N99.81<br>N99.89 | Postprocedural (acute) (chronic) kidney failure<br>Complication of incontinent external stoma of urinary tract<br>Complication of continent stoma of urinary tract<br>Other intraoperative complications of genitourinary system<br>Other postprocedural complications and disorders of genitourinary system |
|        | Varicella infection     | 052.xx | Chickenpox                                                          | B01.x                                           | Varicella [chickenpox]                                                                                                                                                                                                                                                                                       |
|        |                         | 053.xx | Herpes zoster                                                       | B02.xx                                          | Zoster [herpes zoster]                                                                                                                                                                                                                                                                                       |
|        |                         | V05.4  | Need for prophylactic vaccination and inoculation against varicella | Z23                                             | Encounter for immunization                                                                                                                                                                                                                                                                                   |
|        |                         | V01.71 | Contact with or exposure to varicella                               | Z20.820                                         | Contact with and (suspected) exposure to varicella                                                                                                                                                                                                                                                           |
|        | Sepsis                  | 038.xx | Septicemia                                                          | A40.x                                           | Streptococcal sepsis                                                                                                                                                                                                                                                                                         |
|        |                         | 670.2x | Puerperal sepsis                                                    | 085                                             | Puerperal sepsis                                                                                                                                                                                                                                                                                             |
|        |                         | 995.91 | Sepsis                                                              | A41.x                                           | Other sepsis                                                                                                                                                                                                                                                                                                 |
|        |                         |        |                                                                     | A42.7                                           | Actinomycotic sepsis                                                                                                                                                                                                                                                                                         |
|        |                         |        |                                                                     | A54.86                                          | Gonococcal sepsis                                                                                                                                                                                                                                                                                            |
| 995.92 | Severe sepsis           | B37.7  | Candidal sepsis                                                     |                                                 |                                                                                                                                                                                                                                                                                                              |
|        |                         | R65.20 | Severe sepsis without septic shock                                  |                                                 |                                                                                                                                                                                                                                                                                                              |
|        |                         |        | R65.21                                                              | Severe sepsis with septic shock                 |                                                                                                                                                                                                                                                                                                              |

|                         |                          |                                      |                                                                                                                                                                                                                      |       |                                                                                     |                                               |                                               |                                               |
|-------------------------|--------------------------|--------------------------------------|----------------------------------------------------------------------------------------------------------------------------------------------------------------------------------------------------------------------|-------|-------------------------------------------------------------------------------------|-----------------------------------------------|-----------------------------------------------|-----------------------------------------------|
| Osteoporosis            | Osteoporosis             | 733.0x                               | Osteoporosis                                                                                                                                                                                                         | M80.x | Osteoporosis with current pathological fracture                                     |                                               |                                               |                                               |
|                         |                          |                                      |                                                                                                                                                                                                                      | M81.x | Osteoporosis without current pathological fracture                                  |                                               |                                               |                                               |
| Cardiovascular diseases | Myocardial infarction    | 410.xx                               | Acute myocardial infarction                                                                                                                                                                                          | I21.x | Acute myocardial infarction                                                         |                                               |                                               |                                               |
|                         |                          |                                      |                                                                                                                                                                                                                      | I22.x | Subsequent ST elevation (STEMI) and non-ST elevation (NSTEMI) myocardial infarction |                                               |                                               |                                               |
|                         |                          | 412.xx                               | Old myocardial infarction                                                                                                                                                                                            | I25.2 | Old myocardial infarction                                                           |                                               |                                               |                                               |
|                         | Congestive heart failure | 398.91<br>402.01<br>402.11<br>402.91 | Rheumatic heart failure (congestive)<br>Malignant hypertensive heart disease with heart failure<br>Benign hypertensive heart disease with heart failure<br>Unspecified hypertensive heart disease with heart failure | I09.9 | Rheumatic heart disease, unspecified                                                |                                               |                                               |                                               |
|                         |                          |                                      |                                                                                                                                                                                                                      |       | 404.01<br>404.03<br>404.11<br>404.13<br>404.91<br>404.93                            | Hypertensive heart and chronic kidney disease | I11.0                                         | Hypertensive heart disease with heart failure |
|                         |                          |                                      |                                                                                                                                                                                                                      |       | I13.0                                                                               |                                               | Hypertensive heart and chronic kidney disease |                                               |
|                         |                          |                                      |                                                                                                                                                                                                                      |       | I13.2                                                                               |                                               |                                               |                                               |



|  |                         |                           |                                                                                                                                                                                                          |                                                                        |                                                                                                                                                                                                                                                                                    |
|--|-------------------------|---------------------------|----------------------------------------------------------------------------------------------------------------------------------------------------------------------------------------------------------|------------------------------------------------------------------------|------------------------------------------------------------------------------------------------------------------------------------------------------------------------------------------------------------------------------------------------------------------------------------|
|  |                         | 425.4-<br>425.9           | Other primary cardiomyopathies<br>Alcoholic cardiomyopathy<br>Nutritional and metabolic cardiomyopathy<br>Cardiomyopathy in other diseases classified elsewhere<br>Secondary cardiomyopathy, unspecified | I25.5<br>I42.0<br>I42.5<br>I42.6<br>I42.7<br><br>I42.8<br>I42.9<br>I43 | Ischemic cardiomyopathy<br>Dilated cardiomyopathy<br>Other restrictive cardiomyopathy<br>Alcoholic cardiomyopathy<br>Cardiomyopathy due to drug and external agent<br><br>Other cardiomyopathies<br>Cardiomyopathy, unspecified<br>Cardiomyopathy in diseases classified elsewhere |
|  |                         | 428.x                     | Heart failure                                                                                                                                                                                            | I50.x<br>P29.0                                                         | Heart failure<br>Neonatal cardiac failure                                                                                                                                                                                                                                          |
|  | Hypertension            | 401.xx-<br>405.xx         | Hypertensive diseases                                                                                                                                                                                    | I10.x-I16.x                                                            | Hypertensive diseases                                                                                                                                                                                                                                                              |
|  | Cerebrovascular disease | 430.x-<br>438.x<br>362.34 | Cerebrovascular disease<br><br>Transient retinal arterial occlusion                                                                                                                                      | G45.x<br><br>G46.x<br><br>H34.0x<br>I60.x-I69.x                        | Transient cerebral ischemic attacks and related syndromes<br><br>Vascular syndromes of brain in cerebrovascular diseases<br><br>Transient retinal artery occlusion<br>Cerebrovascular diseases                                                                                     |

|        |                             |                                                                                         |                                                                                                                                                                                                                                                                                                                                             |                                                                                                                                |                                                                                                                                                                                                                                                                                                                                                                                                                                                                                                                                                                                                            |
|--------|-----------------------------|-----------------------------------------------------------------------------------------|---------------------------------------------------------------------------------------------------------------------------------------------------------------------------------------------------------------------------------------------------------------------------------------------------------------------------------------------|--------------------------------------------------------------------------------------------------------------------------------|------------------------------------------------------------------------------------------------------------------------------------------------------------------------------------------------------------------------------------------------------------------------------------------------------------------------------------------------------------------------------------------------------------------------------------------------------------------------------------------------------------------------------------------------------------------------------------------------------------|
|        | Peripheral vascular disease | 093.0<br>437.3<br>440.x<br>441.x<br>447.1<br>557.1<br>557.9<br>443.1-<br>443.9<br>V43.4 | Aneurysm of aorta, specified as syphilitic<br>Cerebral aneurysm, nonruptured<br>Atherosclerosis<br>Aortic aneurysm and dissection<br>Stricture of artery<br>Chronic vascular insufficiency of intestine<br>Unspecified vascular insufficiency of intestine<br>Other peripheral vascular disease<br><br>Blood vessel replaced by other means | I70.x<br>I71.x<br>I73.1<br>I73.8x<br>I73.9<br>I77.1<br>I79.0<br><br>I79.2<br><br>K55.1<br>K55.8<br>K55.9<br>Z95.8<br><br>Z95.9 | Atherosclerosis<br>Aortic aneurysm and dissection<br>Thromboangiitis obliterans [Buerger's disease]<br>Other specified peripheral vascular diseases<br>Peripheral vascular disease, unspecified<br>Stricture of artery<br>Aneurysm of aorta in diseases classified elsewhere<br>Peripheral angiopathy in diseases classified elsewhere<br>Chronic vascular disorders of intestine<br>Other vascular disorders of intestine<br>Vascular disorder of intestine, unspecified<br>Presence of other cardiac and vascular implants and grafts<br>Presence of cardiac and vascular implant and graft, unspecified |
| Stroke | Stroke                      | 433.01<br><br>433.11<br><br>433.21<br><br>433.31                                        | Occlusion and stenosis of basilar artery with cerebral infarction<br><br>Occlusion and stenosis of carotid artery with cerebral infarction<br><br>Occlusion and stenosis of vertebral artery with cerebral infarction<br><br>Occlusion and stenosis of multiple and bilateral                                                               | I63.x                                                                                                                          | Cerebral infarction                                                                                                                                                                                                                                                                                                                                                                                                                                                                                                                                                                                        |

|               |                   |        |                                                                                                                                        |             |                                     |
|---------------|-------------------|--------|----------------------------------------------------------------------------------------------------------------------------------------|-------------|-------------------------------------|
|               |                   | 433.81 | precerebral arteries with cerebral infarction<br>Occlusion and stenosis of other specified precerebral artery with cerebral infarction |             |                                     |
|               |                   | 433.91 | Occlusion and stenosis of unspecified precerebral artery with cerebral infarction                                                      |             |                                     |
|               |                   | 434.01 |                                                                                                                                        |             |                                     |
|               |                   | 434.11 | Cerebral thrombosis with cerebral infarction                                                                                           |             |                                     |
|               |                   | 434.91 | Cerebral embolism with cerebral infarction<br>Cerebral artery occlusion, unspecified with cerebral infarction                          |             |                                     |
| Diabetes      | Diabetes mellitus | 250.xx | Diabetes mellitus                                                                                                                      | E08.x-E14.x | Diabetes mellitus                   |
| Renal disease | Renal disease     | V42.0  | Kidney replaced by transplant                                                                                                          | N03.2-      | Chronic nephritic syndrome          |
|               |                   | V45.1x | Renal dialysis status; postprocedural state                                                                                            | N03.7       | Unspecified nephritic syndrome      |
|               |                   | V56.x  | Encounter for dialysis and dialysis catheter care                                                                                      | N05.2-      |                                     |
|               |                   | 582.x  | Chronic glomerulonephritis                                                                                                             | N05.7       | Chronic kidney disease (CKD)        |
|               |                   | 585.x  | Chronic kidney disease (CKD)                                                                                                           | N18.x       | Unspecified kidney failure          |
|               |                   | 586    | Renal failure, unspecified                                                                                                             | N19         | Renal osteodystrophy                |
|               |                   | 588.0  | Renal osteodystrophy                                                                                                                   | N25.0       | Preparatory care for renal dialysis |
|               |                   | 583.0- | Nephritis and nephropathy, not specified as acute                                                                                      | Z49.0x      | Extracorporeal dialysis             |
|               |                   | 583.7  | or chronic                                                                                                                             | Z49.1       | Other dialysis                      |
|               |                   |        |                                                                                                                                        | Z49.2       | Kidney transplant status            |
|               |                   |        |                                                                                                                                        | Z94.0       | Dependence on renal dialysis        |
|               |                   |        |                                                                                                                                        | Z99.2       |                                     |

|                             |                      |                                                                                        |                                                                                          |                                                                    |                                                                                                                                                                                                                                                                                                                                                                                                                                                             |
|-----------------------------|----------------------|----------------------------------------------------------------------------------------|------------------------------------------------------------------------------------------|--------------------------------------------------------------------|-------------------------------------------------------------------------------------------------------------------------------------------------------------------------------------------------------------------------------------------------------------------------------------------------------------------------------------------------------------------------------------------------------------------------------------------------------------|
|                             |                      | 403.01<br>403.11<br>403.91<br>404.02<br>404.03<br>404.12<br>404.13<br>404.92<br>404.93 | Hypertensive chronic kidney disease<br>Hypertensive heart and chronic kidney disease     | I12.0<br><br>I13.1x                                                | Hypertensive chronic kidney disease with stage 5 chronic kidney disease or end stage renal disease<br>Hypertensive heart and chronic kidney disease without heart failure                                                                                                                                                                                                                                                                                   |
| Immuno-inflammation-related | Rheumatoid arthritis | 714.0<br>714.2                                                                         | Rheumatoid arthritis<br>Other rheumatoid arthritis with visceral or systemic involvement | M05.1x<br>M05.2x<br>M05.3x<br>M05.4x<br>M05.5x<br>M05.7x<br>M05.8x | Rheumatoid lung disease with rheumatoid arthritis<br>Rheumatoid vasculitis with rheumatoid arthritis<br>Rheumatoid heart disease with rheumatoid arthritis<br>Rheumatoid myopathy with rheumatoid arthritis<br>Rheumatoid polyneuropathy with rheumatoid arthritis<br>Rheumatoid arthritis with rheumatoid factor without organ or systems involvement<br>Other rheumatoid arthritis with rheumatoid factor<br>Rheumatoid arthritis with rheumatoid factor, |

|  |                                  |                |                                                |                                                        |                                                                                                                                                                                        |
|--|----------------------------------|----------------|------------------------------------------------|--------------------------------------------------------|----------------------------------------------------------------------------------------------------------------------------------------------------------------------------------------|
|  |                                  |                |                                                | M05.9<br>M06.0x<br>M06.2x<br>M06.3x<br>M06.8x<br>M06.9 | unspecified<br>Rheumatoid arthritis without rheumatoid factor<br>Rheumatoid bursitis<br>Rheumatoid nodule<br>Other specified rheumatoid arthritis<br>Rheumatoid arthritis, unspecified |
|  | Thyroiditis                      | 245.x          | Thyroiditis                                    | E06.x                                                  | Thyroiditis                                                                                                                                                                            |
|  | Inflammatory bowel disease (IBD) | 555.x<br>556.x | Regional enteritis<br>Ulcerative enterocolitis | K50.x<br>K51.x                                         | Crohn's disease (regional enteritis)<br>Ulcerative colitis                                                                                                                             |

ICD-9-CM: International Classification of Diseases, Ninth Revision, Clinical Modification; ICD-10-CM: International Classification of Diseases, Tenth Revision, Clinical Modification.

**Supplementary Table 2. 12-month disease severity and flare occurrence (N=37,726)**

|                                                      | No OCS use<br>(n=21,517) | 0 periods of<br>prevalent OCS use<br>(n=5,390) | 1 period of prevalent<br>OCS use<br>(n=4,491) | 2 periods of<br>prevalent OCS use<br>(n=6,328) |
|------------------------------------------------------|--------------------------|------------------------------------------------|-----------------------------------------------|------------------------------------------------|
| <b>Disease severity, n (%)</b>                       |                          |                                                |                                               |                                                |
| Mild                                                 | 15,970 (74.2)            | 1,401 (26.0) <sup>a</sup>                      | 346 (7.7) <sup>a</sup>                        | 158 (2.5) <sup>a</sup>                         |
| Moderate                                             | 3,632 (16.9)             | 3,170 (58.8) <sup>a</sup>                      | 3,017 (67.2) <sup>a</sup>                     | 4,191 (66.2) <sup>a</sup>                      |
| Severe                                               | 1,915 (8.9)              | 819 (15.2) <sup>a</sup>                        | 1,128 (25.1) <sup>a</sup>                     | 1,979 (31.3) <sup>a</sup>                      |
| <b>SLE flares</b>                                    |                          |                                                |                                               |                                                |
| Patients with ≥1 SLE flare, n (%)                    | 13,085 (60.8)            | 4,807 (89.2) <sup>a</sup>                      | 4,227 (94.1) <sup>a</sup>                     | 6,008 (94.9) <sup>a</sup>                      |
| Number of any SLE flares per patient, mean (SD)      | 1.9 (1.0)                | 2.8 (1.3) <sup>a</sup>                         | 3.1 (1.4) <sup>a</sup>                        | 3.1 (1.5) <sup>a</sup>                         |
| Patients with ≥1 mild SLE flare, n (%)               | 4,072 (18.9)             | 2,378 (44.1) <sup>a</sup>                      | 2,129 (47.4) <sup>a</sup>                     | 2,769 (43.8) <sup>a</sup>                      |
| Number of mild SLE flares per patient, mean (SD)     | 1.3 (0.5)                | 1.4 (0.7) <sup>a</sup>                         | 1.3 (0.6) <sup>a</sup>                        | 1.3 (0.6) <sup>a</sup>                         |
| Patients with ≥1 moderate SLE flare, n (%)           | 11,172 (51.9)            | 4,309 (79.9) <sup>a</sup>                      | 3,932 (87.6) <sup>a</sup>                     | 5,624 (88.9) <sup>a</sup>                      |
| Number of moderate SLE flares per patient, mean (SD) | 1.7 (0.8)                | 2.2 (1.1) <sup>a</sup>                         | 2.3 (1.1) <sup>a</sup>                        | 2.3 (1.1) <sup>a</sup>                         |
| Patients with ≥1 severe SLE flare, n (%)             | 546 (2.5)                | 385 (7.1) <sup>a</sup>                         | 775 (17.3) <sup>a</sup>                       | 1,527 (24.1) <sup>a</sup>                      |
| Number of severe SLE flares per patient, mean (SD)   | 1.2 (0.7)                | 1.3 (0.7) <sup>b</sup>                         | 1.3 (0.6) <sup>c</sup>                        | 1.4 (0.9) <sup>a</sup>                         |

|                                                             |               |                           |                           |                           |
|-------------------------------------------------------------|---------------|---------------------------|---------------------------|---------------------------|
| Patients with $\geq 1$ moderate/severe SLE flare, n (%)     | 11,352 (52.8) | 4,374 (81.2) <sup>a</sup> | 4,016 (89.4) <sup>a</sup> | 5,753 (90.9) <sup>a</sup> |
| Number of moderate/severe SLE flares per patient, mean (SD) | 1.7 (0.9)     | 2.3 (1.1) <sup>a</sup>    | 2.5 (1.2) <sup>a</sup>    | 2.6 (1.3) <sup>a</sup>    |

---

<sup>a</sup>p<0.01 compared with the no OCS use cohort; <sup>b</sup>p $\geq$ 0.05 compared with the no OCS use cohort; <sup>c</sup>p<0.05 compared with the no OCS use cohort  
OCS, oral corticosteroids; SD, standard deviation; SLE, systemic lupus erythematosus

**Supplementary Table 3. Healthcare costs for the prevalent OCS use cohort (>7.5 mg/day) exposure categories and the no OCS use cohort, over the 12-month observation period (N=37,725)**

| 2018 USD                                                                   | No OCS use<br>(n=21,516) | 0 periods of prevalent OCS<br>use<br>(n=8,901) | 1 period of prevalent<br>OCS use<br>(n=3,595) | 2 periods of prevalent OCS<br>use<br>(n=3,713) |
|----------------------------------------------------------------------------|--------------------------|------------------------------------------------|-----------------------------------------------|------------------------------------------------|
| <b>Total costs, USD, mean (SD)</b>                                         | <b>12,109 (22,821)</b>   | <b>25,516 (39,343)</b>                         | <b>40,816 (59,349)</b>                        | <b>52,927 (76,032)</b>                         |
| Adjusted cost difference <sup>a</sup><br>(95% CI) vs the no OCS use cohort | -                        | 7,033 (6,187, 7,907)                           | 16,231 (14,438, 18,184)                       | 23,020 (20,632, 25,305)                        |
| Medical costs, mean (SD)                                                   | 9612 (20,675)            | 18,955 (35,283)                                | 32,172 (54,423)                               | 41,180 (68,504)                                |
| Adjusted cost difference <sup>a</sup><br>(95% CI) vs the no OCS use cohort | -                        | 4818 (4,048, 5,622)                            | 13,319 (11,582, 15,275)                       | 18,777 (16,562, 21,062)                        |
| Pharmacy costs, mean (SD)                                                  | 2226 (4899)              | 6,121 (9,059)                                  | 8,174 (12,004)                                | 11,016 (17,063)                                |
| Adjusted cost difference <sup>a</sup><br>(95% CI) vs the no OCS use cohort | -                        | 2,084 (1,842, 2,314)                           | 2,895 (2,545, 3,248)                          | 3,999 (3,578, 4,435)                           |

<sup>a</sup>p<0.01

CI, confidence intervals; OCS, oral corticosteroids; SD, standard deviation; USD, United States Dollars



**Supplementary Table 4. Odds of experiencing OCS-related AEs by organ domain in the prevalent OCS use cohort exposure categories and the no OCS use cohort over the observation period (N=37,725)**

|                                            | No OCS use<br>(n=21,516) | 0 periods of OCS use<br>(n=5,390) | 1 period of OCS use<br>(n=4,491) | 2 periods of OCS use<br>(n=6,328) |
|--------------------------------------------|--------------------------|-----------------------------------|----------------------------------|-----------------------------------|
| <b>Any OCS-related AE</b>                  |                          |                                   |                                  |                                   |
| <i>Incidence, %</i>                        | 75.3                     | 85.7                              | 89.3                             | 91.9                              |
| <i>Adjusted OR (95% CI)</i>                | -                        | 1.39 (1.25, 1.55)                 | 1.80 (1.57, 2.06)                | 2.32 (2.02, 2.68)                 |
| <i>P-value</i>                             | -                        | <0.01                             | <0.01                            | <0.01                             |
| <b>Bone and muscle<sup>a</sup></b>         |                          |                                   |                                  |                                   |
| <i>Incidence, %</i>                        | 26.1                     | 36.9                              | 41.3                             | 45.8                              |
| <i>Adjusted OR (95% CI)</i>                | -                        | 1.46 (1.35, 1.59)                 | 1.69 (1.54, 1.85)                | 1.92 (1.75, 2.10)                 |
| <i>P-value</i>                             | -                        | <0.01                             | <0.01                            | <0.01                             |
| <b>Immune system-related<sup>b</sup></b>   |                          |                                   |                                  |                                   |
| <i>Incidence, %</i>                        | 20.4                     | 31.1                              | 37.0                             | 43.3                              |
| <i>Adjusted OR (95% CI)</i>                | -                        | 1.40 (1.29, 1.52)                 | 1.65 (1.51, 1.81)                | 2.02 (1.85, 2.21)                 |
| <i>P-value</i>                             | -                        | <0.01                             | <0.01                            | <0.01                             |
| <b>Central nervous system<sup>c</sup></b>  |                          |                                   |                                  |                                   |
| <i>Incidence, %</i>                        | 27.6                     | 32.5                              | 36.3                             | 39.3                              |
| <i>Adjusted OR (95% CI)</i>                | -                        | 1.11 (1.02, 1.21)                 | 1.23 (1.11, 1.36)                | 1.38 (1.25, 1.52)                 |
| <i>P-value</i>                             | -                        | 0.02                              | <0.01                            | <0.01                             |
| <b>Metabolic and endocrine<sup>d</sup></b> |                          |                                   |                                  |                                   |
| <i>Incidence, %</i>                        | 32.8                     | 34.0                              | 37.4                             | 42.1                              |
| <i>Adjusted OR (95% CI)</i>                | -                        | 0.97 (0.89, 1.06)                 | 1.04 (0.94, 1.15)                | 1.22 (1.11, 1.35)                 |
| <i>P-value</i>                             | -                        | 0.46                              | 0.46                             | <0.01                             |
| <b>Cardiovascular<sup>e</sup></b>          |                          |                                   |                                  |                                   |
| <i>Incidence, %</i>                        | 36.6                     | 45.7                              | 49.9                             | 55.7                              |
| <i>Adjusted OR (95% CI)</i>                | -                        | 1.32 (1.21, 1.45)                 | 1.53 (1.37, 1.70)                | 1.95 (1.76, 2.17)                 |
| <i>P-value</i>                             | -                        | <0.01                             | <0.01                            | <0.01                             |
| <b>Gastrointestinal<sup>f</sup></b>        |                          |                                   |                                  |                                   |
| <i>Incidence, %</i>                        | 11.1                     | 16.9                              | 20.3                             | 25.4                              |
| <i>Adjusted OR (95% CI)</i>                | -                        | 1.36 (1.23, 1.51)                 | 1.46 (1.31, 1.63)                | 1.90 (1.71, 2.11)                 |
| <i>P-value</i>                             | -                        | <0.01                             | <0.01                            | <0.01                             |
| <b>Ophthalmologic<sup>g</sup></b>          |                          |                                   |                                  |                                   |
| <i>Incidence, %</i>                        | 12.5                     | 13.8                              | 16.2                             | 17.0                              |
| <i>Adjusted OR (95% CI)</i>                | -                        | 1.04 (0.92, 1.16)                 | 1.37 (1.21, 1.56)                | 1.41 (1.25, 1.60)                 |

|                                    |     |                   |                   |                   |
|------------------------------------|-----|-------------------|-------------------|-------------------|
| <i>P-value</i>                     | -   | 0.55              | <0.01             | <0.01             |
| Dermatologic <sup>h</sup>          |     |                   |                   |                   |
| <i>Incidence, %</i>                | 3.1 | 3.0               | 3.2               | 3.8               |
| <i>Adjusted OR (95% CI)</i>        | -   | 0.88 (0.70, 1.09) | 0.88 (0.69, 1.13) | 1.06 (0.83, 1.34) |
| <i>P-value</i>                     | -   | 0.24              | 0.32              | 0.65              |
| Hematologic/oncologic <sup>i</sup> |     |                   |                   |                   |
| <i>Incidence, %</i>                | 1.8 | 2.9               | 4.3               | 6.4               |
| <i>Adjusted OR (95% CI)</i>        | -   | 1.32 (1.06, 1.64) | 1.78 (1.43, 2.22) | 2.53 (2.05, 3.11) |
| <i>P-value</i>                     | -   | 0.01              | <0.01             | <0.01             |

<sup>a</sup>Bone and muscle disorders included bursitis, fractures, avascular necrosis, muscle weakness, loss of muscle mass, osteoporosis, back pain, and myopathy

<sup>b</sup>Immune system-related disorders included fungal infections, pneumonia, sepsis, tuberculosis, urinary tract infection, and varicella infection

<sup>c</sup>Central nervous system disorders included akathisia, bipolar disorder, depression, sleep disturbances, steroid psychosis, and migraines

<sup>d</sup>Metabolic and endocrine disorders included Cushing syndrome, diabetes mellitus, drug-induced adrenocortical insufficiency, dyslipidemia, hyperglycemia, metabolic syndrome, and obesity

<sup>e</sup>Cardiovascular disorders included atrial fibrillation/flutter, congestive heart failure, hypertension, myocardial infarction, and stroke

<sup>f</sup>Gastrointestinal disorders included abdominal distension, acute pancreatitis, chronic gastrointestinal bleeds/ulcers, dyspepsia, gastrointestinal bleeds/ulcers, and nausea/vomiting

<sup>g</sup>Ophthalmologic disorders included cataracts and glaucoma

<sup>h</sup>Dermatologic disorders included acne, erythema, and hirsutism

<sup>i</sup>Hematologic/oncologic disorders included bladder cancer, epistaxis, and leukocytosis

AE, adverse event; CI, confidence intervals; OCS, oral corticosteroids; OR, odds ratio; SD, standard deviation

## Supplementary Figure 1. Study attrition

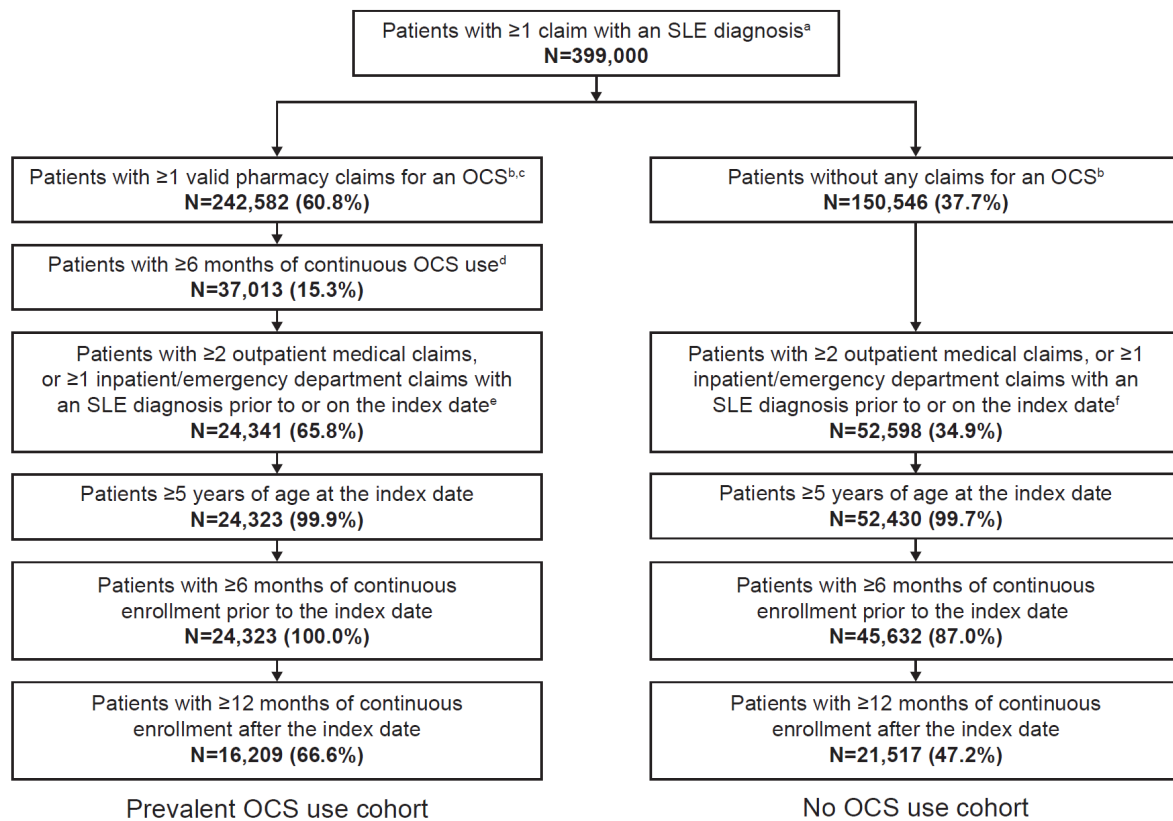

<sup>a</sup>Patients with SLE were identified using International Classification of Diseases, Ninth and Tenth Revision, (ICD-9 codes and ICD-10) codes. ICD-9 codes included: 710.0x. ICD-10 codes included: M32.0, M32.1x, M32.8, and M32.9

<sup>b</sup>Pharmacy OCS claims were identified using GPI class 22, and OCS administered in a hospital or other institutional settings were identified using HCPCS codes

<sup>c</sup>For patients with a pharmacy claim for an OCS, a valid claim was defined as a claim with no missing values for both days of supply and quantity; 5,872 (1.5%) patients were excluded due to invalid pharmacy claims for an OCS

<sup>d</sup>A period of continuous OCS use was defined as a period with no gaps in supply of >30 days

<sup>e</sup>The index date for patients was defined as the date of the first pharmacy claim for an OCS after 6-month of continuous OCS use

<sup>f</sup>The index date for patients without any claims for an OCS was imputed based on the distribution of time between the first SLE diagnosis within the continuous eligibility period and index date in the cohort of patients with at least one claim for an OCS

GPI, Generic product identifier; HCPCS, Healthcare Common Procedure Coding System; ICD-9-CM, International Classification of Diseases, Ninth Revision, Clinical Modification; ICD-10-CM, International Classification of Diseases, Tenth Revision, Clinical Modification; OCS, Oral corticosteroid; SLE, Systemic lupus erythematosus

**Supplementary Figure 2. OCS ADD by observation period and days supply definitions (N=16,209)**

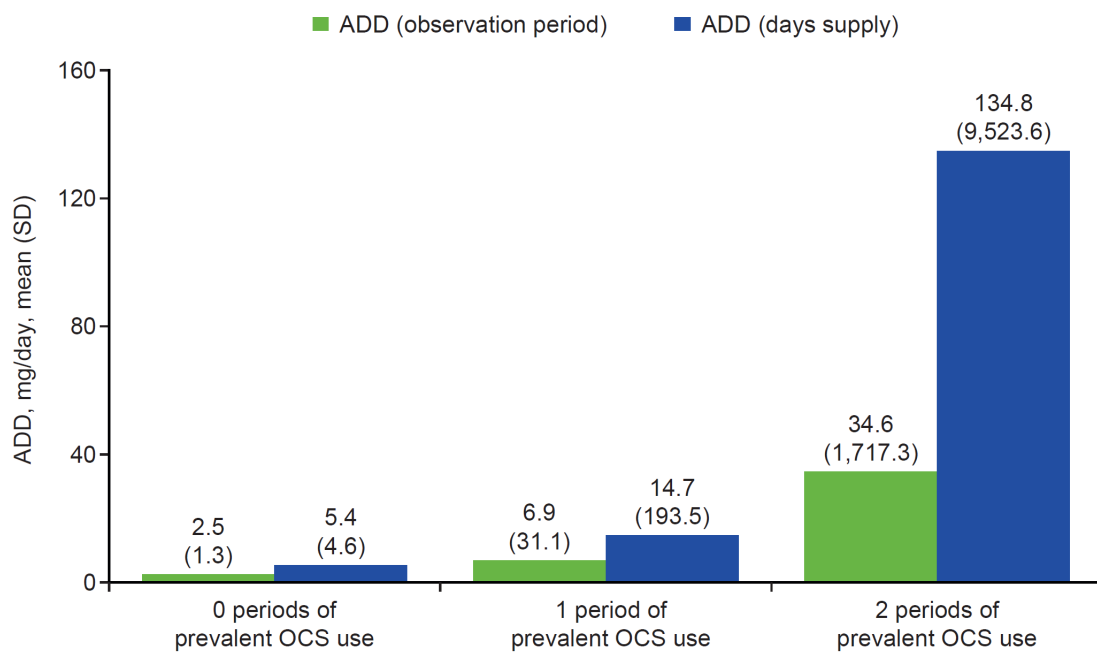

ADD (observation period) was defined as total dose (strength x quantity) within each 6-month period divided by the total number of days within each 6-month period. ADD (days supply) was defined as total dose (strength x quantity) within each 6-month period divided by the total number of days of supply within each 6-month period

ADD, average daily dose; OCS, oral corticosteroid; SD, standard deviation
